# Supplementary material
Source: HighWire-hosted journal article supplement (https://erj.ersjournals.com/content/51/2/1701774)
Supplement: inline-supplementary-material-1 [file inline-supplementary-material-1.pdf]

**Table S1.** Baseline characteristics of the study population (Intention to treat population)

|                                                                      | Sham (n=28) | CPAP (n=28) | p-value |
|----------------------------------------------------------------------|-------------|-------------|---------|
| Age, years                                                           | 49.1 ± 10.4 | 49.4 ± 11.0 | 0.901   |
| Male gender, n (%)                                                   | 26 (93)     | 26 (93)     | 1.000.  |
| Height, cm                                                           | 169.4 ± 7.2 | 170.5 ± 6.6 | 0.671   |
| Weight, kg                                                           | 75.6 ± 12.5 | 81.2 ± 11.5 | 0.038   |
| Body mass index, kg/m <sup>2</sup>                                   | 26.2 ± 3.1  | 27.8 ± 2.7  | 0.036   |
| Body surface area, m <sup>2</sup>                                    | 1.88 ± 0.18 | 1.94 ± 0.17 | 0.234   |
| Hypertension, n (%)                                                  | 15 (54)     | 18 (64)     | 0.587   |
| Diabetes mellitus, n (%)                                             | 2 (7)       | 4 (14)      | 0.669   |
| Dyslipidemia, n (%)                                                  | 2 (7)       | 10 (36)     | 0.020   |
| No. of current smokers, n (%)                                        | 6 (21)      | 10 (36)     | 0.248   |
| Medications                                                          |             |             |         |
| Calcium channel blockers, n (%)                                      | 8 (29)      | 11 (39)     | 0.573   |
| RAAS blockers, n (%)                                                 | 8 (29)      | 10 (36)     | 0.775   |
| Beta-blockers, n (%)                                                 | 4 (14)      | 4 (14)      | 1.000   |
| Diuretics, n (%)                                                     | 0 (0)       | 0 (0)       | 1.000   |
| Statin, n (%)                                                        | 2 (7)       | 10 (36)     | 0.020   |
| Apnea-hypopnea index, events/hour                                    | 52.3 ± 20.2 | 63.0 ± 20.2 | 0.052   |
| Mean oxygen saturation (%)                                           | 94.4± 1.5   | 93.7± 1.8   | 0.154   |
| Percentage of sleep time with SpO <sub>2</sub> saturation < 90 % (%) | 7.1 ± 7.3   | 10.2± 11.3  | 0.225   |

|                                      |                 |                 |       |
|--------------------------------------|-----------------|-----------------|-------|
| Oxygen desaturation index            | $30.1 \pm 22.7$ | $27.5 \pm 21.6$ | 0.677 |
| Average heart rate during sleep      | $63.1 \pm 6.9$  | $63.6 \pm 6.7$  | 0.776 |
| Adherence to CPAP treatment (hr/day) | $4.6 \pm 1.2$   | $5.1 \pm 1.7$   | 0.157 |
| CPAP device use >4hr/day             | 23 (82)         | 23 (82)         | 1.000 |

---

RAAS, renin-angiotensin-aldosterone system

**Table S2.** Echocardiographic variables at baseline and 3 months after treatment (Intention to treat population)

|                                    | Sham (n=28) |             | CPAP (n=28) |             |
|------------------------------------|-------------|-------------|-------------|-------------|
|                                    | Baseline    | Follow-up   | Baseline    | Follow-up   |
| LVEDD, mm                          | 49 ± 3      | 48 ± 3      | 50 ± 3      | 49 ± 2      |
| LVEDS, mm                          | 32 ± 3      | 31 ± 2      | 32 ± 3      | 32 ± 2      |
| LVEF, %                            | 66 ± 5      | 67 ± 5      | 69 ± 5      | 67 ± 6      |
| Relative wall thickness            | 0.38 ± 0.05 | 0.40 ± 0.04 | 0.40 ± 0.04 | 0.40 ± 0.04 |
| LV mass index, g/m <sup>2</sup>    | 85.0 ± 12.8 | 83.9 ± 14.1 | 92.0 ± 15.4 | 91.2 ± 11.9 |
| LA volume index, ml/m <sup>2</sup> | 25.4 ± 5.5  | 23.8 ± 5.3  | 26.1 ± 5.8  | 26.6 ± 5.2  |
| e' velocity, cm/sec                |             |             |             |             |
| At rest                            | 9.3 ± 2.6   | 8.7 ± 2.9   | 7.6 ± 2.2†  | 8.3 ± 2.3   |
| At 25 watts                        | 11.2 ± 2.1  | 10.6 ± 2.1  | 9.5 ± 1.8†  | 9.9 ± 2.1   |
| At 50 watts                        | 12.0 ± 2.4  | 11.7 ± 3.0  | 10.4 ± 2.2† | 10.5 ± 2.6  |
| E/e'                               |             |             |             |             |
| At rest                            | 7.5 ± 1.6   | 7.9 ± 1.8   | 8.9 ± 2.3†  | 8.9 ± 2.4   |
| At 25 watts                        | 8.3 ± 2.0   | 8.3 ± 1.8   | 9.3 ± 2.3   | 9.3 ± 2.7   |
| At 50 watts                        | 8.6 ± 2.2   | 8.8 ± 1.9   | 9.8 ± 2.5   | 10.1 ± 3.4  |
| S' velocity, cm/sec                |             |             |             |             |
| At rest                            | 8.4 ± 1.6   | 9.1 ± 2.0   | 8.7 ± 1.4   | 8.9 ± 1.6   |

|             |            |            |           |           |
|-------------|------------|------------|-----------|-----------|
| At 25 watts | 8.9 ± 1.3  | 9.2 ± 1.8  | 8.8 ± 1.6 | 8.7 ± 1.7 |
| At 50 watts | 10.2 ± 1.7 | 10.2 ± 1.9 | 9.9 ± 1.8 | 9.8 ± 1.3 |

\*Paired *t*-test, *p* < 0.05, compared with the value at baseline within the group

<sup>†</sup>Student's *t*-test, *p* < 0.05, compared with corresponding sham group

LVEDD, left ventricular end-diastolic dimension; LVESD, left ventricular end-systolic dimension; e', early diastolic mitral annular tissue; LVEF, left ventricular ejection fraction; LV, left ventricle; LA, left atrium; S', systolic mitral annular tissue.

**Table S3.** Peripheral, central, and 24-hour ambulatory BP variables at baseline and 3 months after treatment (Intention to treat population).

|                          | Sham (n=28)  |              | CPAP (n=28)  |              |
|--------------------------|--------------|--------------|--------------|--------------|
|                          | Baseline     | Follow-up    | Baseline     | Follow-up    |
| <b><i>Peripheral</i></b> |              |              |              |              |
| Systolic BP, mmHg        | 136.7 ± 21.8 | 131.6 ± 14.4 | 133.4 ± 22.0 | 131.0 ± 11.7 |
| Diastolic BP, mmHg       | 78.4 ± 12.4  | 78.7 ± 10.5  | 78.1 ± 13.8  | 78.1 ± 9.8   |
| PP, mmHg                 | 58.3 ± 23.4  | 52.9 ± 8.1   | 55.2 ± 18.4  | 52.9 ± 8.6   |
| <b><i>Central</i></b>    |              |              |              |              |
| Systolic BP, mmHg        | 114.8 ± 15.4 | 115.5 ± 11.6 | 114.4 ± 17.8 | 115.9 ± 9.8  |
| Diastolic BP, mmHg       | 77.8 ± 10.7  | 80.4 ± 10.8  | 77.1 ± 14.3  | 79.5 ± 10.0  |
| PP, mmHg                 | 37.1 ± 8.3   | 35.2 ± 4.4   | 37.4 ± 7.3   | 36.4 ± 8.2   |
| AP, mmHg                 | 7.3 ± 5.8    | 5.1 ± 5.9    | 5.6 ± 5.5    | 5.8 ± 5.4    |

|                               |              |              |              |              |
|-------------------------------|--------------|--------------|--------------|--------------|
| AIx@75, %                     | 19.4 ± 23.2  | 13.8 ± 13.8  | 16.4 ± 18.4  | 14.0 ± 10.1  |
| PWV, m/sec                    | 8.1 ± 1.1    | 8.1 ± 1.0    | 8.1 ± 1.4    | 7.2 ± 1.0 *† |
| PP amplification              | 1.62 ± 0.73  | 1.51 ± 0.23  | 1.51 ± 0.57  | 1.48 ± 0.20  |
| Heart rate, beats/min         | 69.6 ± 12.1  | 72.6 ± 11.1  | 68.7 ± 8.7   | 72.7 ± 10.4  |
| <b>24 hour ambulatory</b>     |              |              |              |              |
| Mean systolic BP, mmHg        | 126.3 ± 24.1 | 123.4 ± 10.9 | 130.6 ± 17.8 | 125.4 ± 12.3 |
| Mean diastolic BP, mmHg       | 82.7 ± 14.3  | 78.6 ± 7.4   | 84.1 ± 14.2  | 78.8 ± 8.5 * |
| Daytime systolic BP, mmHg     | 136.4 ± 19.5 | 130.2 ± 11.7 | 135.4 ± 18.3 | 131.8 ± 13.0 |
| Daytime diastolic BP, mmHg    | 87.0 ± 14.1  | 82.2 ± 6.9   | 87.6 ± 13.9  | 83.1 ± 9.1   |
| Night-time systolic BP, mmHg  | 117.6 ± 20.2 | 112.6 ± 13.1 | 121.9 ± 17.7 | 114.9 ± 12.7 |
| Night-time diastolic BP, mmHg | 74.9 ± 14.7  | 71.9 ± 8.7   | 77.9 ± 14.4  | 71.5 ± 8.5 * |
| Non-dipper, n (%)             | 6 (21)       | 9 (32)       | 7 (25)       | 8 (29)       |

---

\*Paired *t*-test,  $p < 0.05$ , compared with the value at baseline within the group

†Student's *t*-test,  $p < 0.05$ , compared with corresponding sham group

BP, blood pressure; PP, pulse pressure; AP, augmentation pressure; AIx@75, augmentation index adjusted at heart rate of 75 bpm; PWV, pulse wave velocity; bpm, beats per minute.

**Table S4.** Ventricular-vascular coupling at baseline and 12 weeks after randomization

(Intention to treat population)

|                                              | Sham (n=28)  |               | CPAP (n=28)  |               |
|----------------------------------------------|--------------|---------------|--------------|---------------|
|                                              | Baseline     | Follow-up     | Baseline     | Follow-up     |
| End-systolic volume index, ml/m <sup>2</sup> |              |               |              |               |
| At rest                                      | 17.8 ± 4.2   | 16.3 ± 4.2    | 16.3 ± 4.3   | 16.0 ± 3.2    |
| At 25 watts                                  | 18.3 ± 3.9   | 17.7 ± 3.6    | 17.0 ± 4.1   | 16.9 ± 3.5    |
| At 50 watts                                  | 18.3 ± 4.2   | 16.9 ± 3.4    | 16.3 ± 4.1   | 15.9 ± 3.4    |
| Stroke volume index, ml/m <sup>2</sup>       |              |               |              |               |
| At rest                                      | 35.9 ± 7.6   | 35.7 ± 5.7    | 37.1 ± 8.9   | 40.1 ± 7.7†   |
| At 25 watts                                  | 40.0 ± 5.1   | 39.7 ± 5.7    | 40.4 ± 8.5   | 41.2 ± 7.6    |
| At 50 watts                                  | 41.9 ± 5.2   | 41.7 ± 6.1    | 42.7 ± 8.2   | 43.5 ± 7.1    |
| End-systolic pressure, mmHg                  |              |               |              |               |
| At rest                                      | 114.8 ± 10.2 | 108.9 ± 12.3  | 115.2 ± 15.7 | 108.5 ± 10.5  |
| At 25 watts                                  | 132.0 ± 19.3 | 118.7 ± 12.8* | 131.7 ± 16.2 | 118.8 ± 12.3* |
| At 50 watts                                  | 135.1 ± 17.1 | 128.8 ± 14.8* | 137.1 ± 21.1 | 130.4 ± 17.4  |
| EaI, mmHg/ml/m <sup>2</sup>                  |              |               |              |               |
| At rest                                      | 0.90 ± 0.21  | 0.89 ± 0.24   | 0.88 ± 0.32  | 0.75 ± 0.22*† |
| At 25 watts                                  | 0.93 ± 0.21  | 0.85 ± 0.19*  | 0.91 ± 0.25  | 0.80 ± 0.25*  |
| At 50 watts                                  | 0.94 ± 0.22  | 0.88 ± 0.20   | 0.93 ± 0.33  | 0.84 ± 0.30*  |

EesI, mmHg/ml/m<sup>2</sup>

|             |             |             |             |              |
|-------------|-------------|-------------|-------------|--------------|
| At rest     | 1.95 ± 0.58 | 2.08 ± 0.69 | 1.97 ± 0.71 | 1.85 ± 0.61  |
| At 25 watts | 2.13 ± 0.70 | 2.07 ± 0.74 | 2.18 ± 0.83 | 1.93 ± 0.71* |
| At 50 watts | 2.31 ± 0.67 | 2.36 ± 0.82 | 2.43 ± 1.04 | 2.38 ± 1.29  |

EaI/EesI

|             |             |             |             |              |
|-------------|-------------|-------------|-------------|--------------|
| At rest     | 0.51 ± 0.12 | 0.47 ± 0.13 | 0.45 ± 0.13 | 0.42 ± 0.11* |
| At 25 watts | 0.45 ± 0.11 | 0.44 ± 0.10 | 0.44 ± 0.11 | 0.43 ± 0.11  |
| At 50 watts | 0.43 ± 0.13 | 0.41 ± 0.09 | 0.41 ± 0.11 | 0.37 ± 0.09  |

---

\*Paired *t*-test,  $p < 0.05$ , compared with the value at baseline within the group

†Student's *t*-test,  $p < 0.05$ , compared with the corresponding sham group

EaI, arterial elastance index; EesI, ventricular elastance index; EaI/EesI, ventricular-vascular coupling index.

**Table S5.** Change of E' velocity and PWV after adjustment of baseline characteristics

|                              | Sham (n=26)  | CPAP (n=26) | p-value                                  |
|------------------------------|--------------|-------------|------------------------------------------|
| Change of E' velocity (cm/s) | -0.61 ± 1.85 | 0.65 ± 1.69 | 0.020 <sup>a</sup><br>0.021 <sup>b</sup> |

<sup>a</sup> p value is calculated from ANCOVA with adjustment of BMI

<sup>b</sup> p value is calculated from ANCOVA with adjustment of age, BMI, and left atrial volume index

| Change of E' velocity | beta   | p value | 95% CI          |
|-----------------------|--------|---------|-----------------|
| Active CPAP vs. sham  | 0.366  | 0.018   | 0.243, 2.463    |
| BMI                   | 0.009  | 0.951   | -0.172, 0.183   |
| dyslipidemia          | -0.081 | 0.577   | -1.821, 1.026   |
| Change of PWV         | Beta   | p value | 95% CI          |
| Active CPAP vs. sham  | -0.339 | 0.024   | -23.512, -1.732 |
| BMI                   | 0.287  | 0.043   | 0.065, 3.742    |
| dyslipidemia          | -0.222 | 0.123   | -24.396, 3.013  |

BMI, body mass index; PWV, pulse wave velocity; CPAP, continuous positive airway pressure
